# Supplementary material for: BISR-RNAseq: an efficient and scalable RNAseq analysis workflow with interactive report generation
Source: PubMed Central journal article supplement (PMC6923898; doi:10.1186/s12859-019-3251-1), 2019-12-20

# Supplementary figure

```
{
  "section_1": {=
  "section_2": {=
  "section_3": {=
  "section_4": {=
  "section_5": {
    "Menu": [{
      "name": "Differential Gene Expression",
      "tabName": "menuitem5",
      "display": 1
    }],
    "Submenu": [{
      "name": "Volcano Plot",
      "tabName": "menu5subitem1",
      "display": 1,
      "Uimodule": ["VolcanoInputUI"],
      "data": "volcanto_plot",
      "Servermodule": ["VolcanoServer"],
      "box": [
        {
          "id": "menu5subitem1box1",
          "title": "Volcano Plot",
          "Uibody": ["VolcanoPlotUI"],
          "display": 1
        }
      ]
    }
  ],
  {=
  {=
  ]
}
```

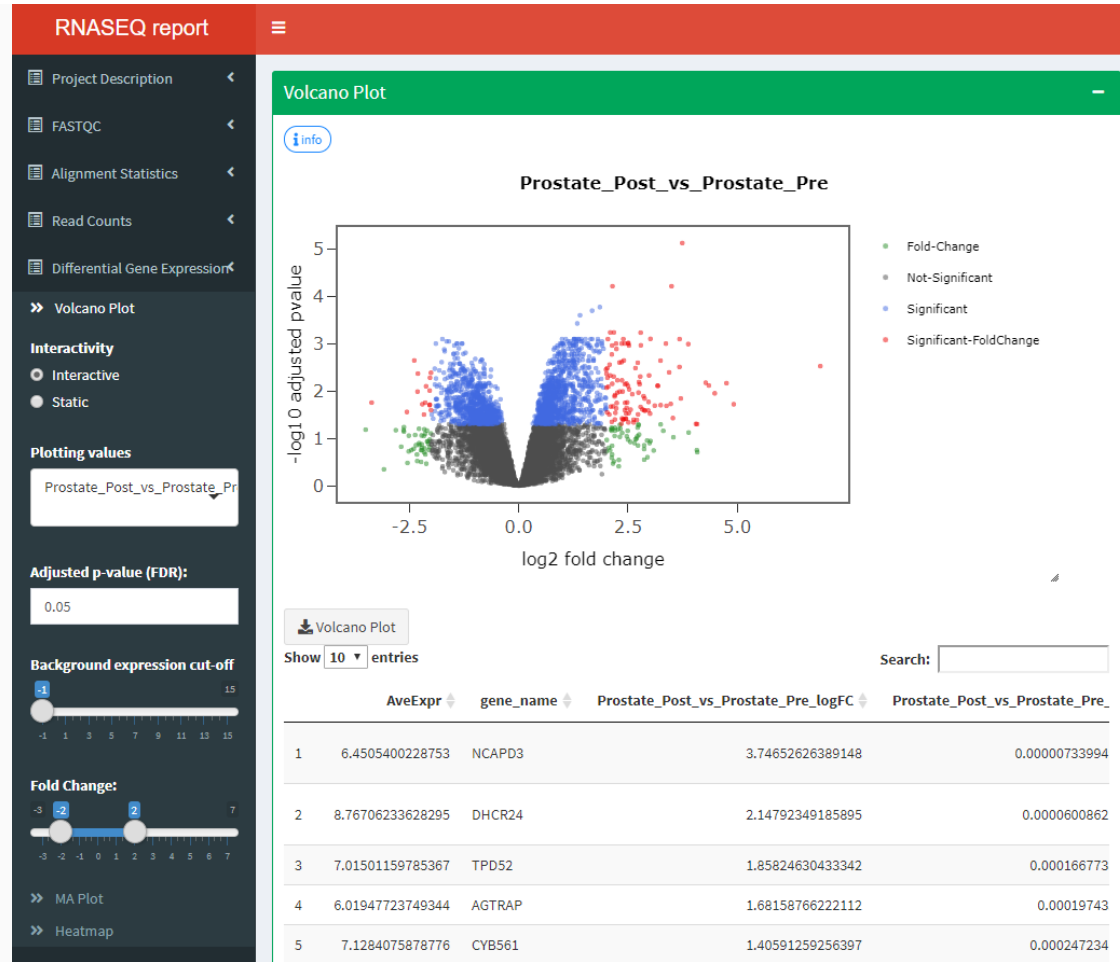

Supplement: 12859_2019_3251_MOESM1_ESM.pdf [file 12859_2019_3251_MOESM1_ESM.pdf]
